# Supplementary material
Source: PubMed Central journal article supplement (PMC5423809)
Supplement: 10-1055-s-0036-1593968_s1600010-1.pdf [file 10-1055-s-0036-1593968_s1600010-1.pdf]

**Supplement 1: Genome review group application for whole genome sequencing**

|                                                                                                                                                                                                                                                                                                                                                                                                                                                                                                                                                                                                                                         |                                                                                                  |                                                                                                   |
|-----------------------------------------------------------------------------------------------------------------------------------------------------------------------------------------------------------------------------------------------------------------------------------------------------------------------------------------------------------------------------------------------------------------------------------------------------------------------------------------------------------------------------------------------------------------------------------------------------------------------------------------|--------------------------------------------------------------------------------------------------|---------------------------------------------------------------------------------------------------|
|                                                                                                                                                                                                                                                                                                                                                                                                                                                                                                                                                        | <p align="center"><b>Genome Review Group<br/>Application for Whole<br/>Genome Sequencing</b></p> | <p><b>For Internal Purposes:</b></p> <p>Date Received:<br/>Date Reviewed:<br/>Application No.</p> |
| <p align="center"><b>WHOLE GENOME SEQUENCING (WGS) APPLICATION</b></p> <p>This program is intended for patients in whom sequencing results have the potential to significantly impact care and management decisions for a current or imminent medical condition of a serious, potentially debilitating nature.</p> <p>All referrals should be evaluated by two physicians who agree that whole genome sequencing is the appropriate next step in the clinical management of the patient. Feel free to contact Dr Gutzeit (mgutzeit@mcw.edu) if you have questions or for additional information prior to submitting an application.</p> |                                                                                                  |                                                                                                   |
| <p><b>1. DOCTOR INFORMATION</b></p>                                                                                                                                                                                                                                                                                                                                                                                                                                                                                                                                                                                                     |                                                                                                  |                                                                                                   |
| Primary/Requesting Provider Name:                                                                                                                                                                                                                                                                                                                                                                                                                                                                                                                                                                                                       | Telephone Number                                                                                 |                                                                                                   |
| Email                                                                                                                                                                                                                                                                                                                                                                                                                                                                                                                                                                                                                                   | Fax Number                                                                                       |                                                                                                   |
| Secondary/Supporting Provider Name:                                                                                                                                                                                                                                                                                                                                                                                                                                                                                                                                                                                                     | Telephone Number                                                                                 |                                                                                                   |
| Email                                                                                                                                                                                                                                                                                                                                                                                                                                                                                                                                                                                                                                   | Fax Number                                                                                       |                                                                                                   |
| <p><b>2. PATIENT INFORMATION</b></p>                                                                                                                                                                                                                                                                                                                                                                                                                                                                                                                                                                                                    |                                                                                                  |                                                                                                   |
| First, Middle and Last Name                                                                                                                                                                                                                                                                                                                                                                                                                                                                                                                                                                                                             | MRN                                                                                              |                                                                                                   |
| Date of Birth (MM/DD/YYYY)                                                                                                                                                                                                                                                                                                                                                                                                                                                                                                                                                                                                              | <input type="checkbox"/> Male <input type="checkbox"/> Female                                    |                                                                                                   |
| <p><b>3. CLINICAL INFORMATION</b></p>                                                                                                                                                                                                                                                                                                                                                                                                                                                                                                                                                                                                   |                                                                                                  |                                                                                                   |
| Indication for testing:<br>Diagnostic<br><input type="checkbox"/> Family History<br><input type="checkbox"/> Other (explain):                                                                                                                                                                                                                                                                                                                                                                                                                                                                                                           | Problem list:                                                                                    |                                                                                                   |
| Clinical Summary (restrict to a maximum of two pages, inclusive as possible, please include patients functional and/or developmental status CHW and external consults)                                                                                                                                                                                                                                                                                                                                                                                                                                                                  |                                                                                                  |                                                                                                   |
| Family History of condition:<br>Yes <input type="checkbox"/> No                                                                                                                                                                                                                                                                                                                                                                                                                                                                                                                                                                         | If so, please attach pedigree, or describe:                                                      |                                                                                                   |
| Work-up Completed to date (diagnostic tests and their results, functional and imaging results, DNA testing)                                                                                                                                                                                                                                                                                                                                                                                                                                                                                                                             |                                                                                                  |                                                                                                   |

List pathways, genes and/or chromosomal regions of interest:

Other comments or information

#### 4. Summary of how establishing a molecular diagnosis will affect clinical care

#### 5. Research Use

Indicate whether there is an intent to generate secondary generalizable knowledge in addition to the clinical care noted above. If so please inform us what IRB protocol this research will be performed under or provide proof of IRB exemption.

*For Internal Use*

Recommendation:

- 1) Recommend performing WGS
- 2) Return to clinician for additional testing and/or additional information
- 3) Reserve for future consideration of WGS
- 4) WGS not recommended
