# Supplementary material
Source: PubMed Central journal article supplement (PMC5423809)
Supplement: 10-1055-s-0036-1593968_s1600010-4.pdf [file 10-1055-s-0036-1593968_s1600010-4.pdf]

**Supplement 4:** Gene list form completed by referring physician listing those genes possibly connected to the patient's phenotype

**PATIENT INFORMATION (Required)**

\_\_\_\_\_

Last Name

\_\_\_\_\_

First Name

\_\_\_\_\_

Date of Birth (mm/dd/yy)

**INSTRUCTIONS:**

Gene list to be completed by ordering physician. Use the gene designations assigned by the HUGO nomenclature committee (website <http://www.genenames.org/>). Provide the gene list in the following format; comma delineated (EX: CFTR,KAL1,STS.....) in the box below. If necessary, use additional form pages.

Large empty box for providing the gene list.

**Ordering Physician Signature (Print name following signature)**

\_\_\_\_\_

Ordering Physician

\_\_\_\_\_

Date (mm/dd/yy)
