# Supplementary material
Source: PubMed Central journal article supplement (PMC5423809)
Supplement: 10-1055-s-0036-1593968_s1600010-5.pdf [file 10-1055-s-0036-1593968_s1600010-5.pdf]

## **Supplement 5:** Elements included in Casava metrics

Casava metrics include:

- Depth of coverage,
- Alignment confidence,
- Evenness of coverage (library diversity),
- Quality of individual base calls (equivalent of the Phred scores),
- Performance of that cluster relative to the neighboring clusters, and
- Quality of the base reads relative to the quality of previous base reads
